# Supplementary material for: Network analysis of microRNA and mRNA seasonal dynamics in a highly plastic sensorimotor neural circuit
Source: PubMed Central journal article supplement (PMC4636775; doi:10.1186/s12864-015-2175-z), 2015-11-06
Supplement: 12864_2015_2175_MOESM3_ESM.pdf [file 12864_2015_2175_MOESM3_ESM.pdf]

A

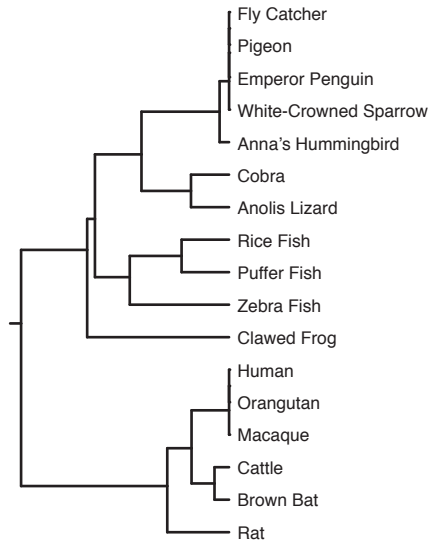

B

|                               |                                                                                                                        |
|-------------------------------|------------------------------------------------------------------------------------------------------------------------|
| <i>Anolis carolinensis</i>    | CCAGTTCTCCAGGAGCAGATG-AGCCACTGACT-AACGCACATTGTGCTTCT--CGTGTCCCAC-TGTGC-GTGTGACAGCGGCTAACCTGCTTTTCGGAC-----             |
| <i>Ophiophagus hannah</i>     | -----CAGAAGCAGGTG-AGCCACTGACT-AACGCACATTGTGCTGCT---ATGTCCCAC-TGTGC-GTGTGACAGCGGCTAACCTGC-----                          |
| <i>Fugu rubripes</i>          | -----TCTAAAAGCAGGTG-AGCCACTGACT-AACGCACATTGCGCCAGTT-GACAGTTCAC-TGTGC-GTGTGACAGCGGCTAACCTG-----                         |
| <i>Oryzias latipes</i>        | TCCGAGTTCTAAAAGCAGGTA-AGCCACTGACT-AACGCACATTGTGCGTGT--GACAGATCCAC-TGTGC-GTGTGACAGCGGCTAACCTG-----                      |
| <i>Danio rerio</i>            | -----GCAGGTA-AGCCACTGACT-AACGCACATTGCGCCTATT-CTCCACTCCAC-TGTGC-GTGTGACAGCGGCTAACCCAG-----                              |
| <i>Xenopus tropicalis</i>     | -----TCCAGATGCAGGTC-AGCCACTGACT-AACGCACATTGCGCTGCTCCTAAAATGCCAC-TGTGC-GTGTGACAGCGGCTAACCCAGCATCTAGGAA-----             |
| <i>Columba livia</i>          | -----CCTCCAGGAGCAGGTG-AGCCACTGACT-AACGCACATTGTGCTCTC--GGCGACTCCAC-TGTGC-GTGTGACAGCGGCTA-----                           |
| <i>Zonotrichia leucophrys</i> | -----CCTCCAGGAGCAGGTG-AGCCACTGACT-AACGCACATTGTGCTCTC--GGCGACTCCAC-TGTGC-GTGTGACAGCGGCT-----                            |
| <i>Aptenodytes forsteri</i>   | -----CCTCCAGGAGCAGGTG-AGCCACTGACT-AACGCACATTGTGCTCTC--GGCGACTCCAC-TGTGC-GTGTGACAGCGGCT-----                            |
| <i>Ficedula albicollis</i>    | -----CCTCCAGGAGCAGGTG-AGCCACTGACT-AACGCACATTGTGCTCTC--GGCGACTCCAC-TGTGC-GTGTGACAGCGGCT-----                            |
| <i>Calypte anna</i>           | -----CCTCCAGGAGCAGGTG-AGCCACTGACT-AACGCACATTGTGCTCTC--GGTACTCCAC-TGTGC-GTGTGACAGCGGCT-----                             |
| <i>Homo sapiens</i>           | -----CCTCCAGGCGCAGGGC-AGCCCCTGCC-ACCGCACACTGCGCTGCC-AGACC-CAC-TGTGC-GTGTGACAGCGGCTGATCTGTGCCTG-GGCAGCGGACCC-----       |
| <i>Pongo pygmaeus</i>         | -----CCTCCAGGCGCAGGGC-AGCCCCTGCC-ACCGCACACTGCGCTGCC-AGACC-CAC-TGTGC-GTGTGACAGCGGCTGATCTGTGCCTGAGGCAGCGGACCC-----       |
| <i>Macaca mulatta</i>         | -----CCTCCAGGCGCAGGGC-AGCCCCTGCC-ACCGCACACTGCGCTGCC-AGACC-CAC-TGTGC-GTGTGACAGCGGCTGATCTGTGCCTG-GGCAGCGGACCC-----       |
| <i>Bos taurus</i>             | -----CCTCCAGGCGCAGGGC-AGCCACTGCC-ACCGCACACTGCGCTGTCC--GGACC-CAC-TGTGC-GTGTGACAGCGGCTGATCTGTCCCTG-GGCAGCGGACCC-----     |
| <i>Rattus norvegicus</i>      | -----CCTCCAGGCTCAGGAC-AGCCACTGCC-ACAGCACACTGCGTGTCTCC--GGACC-CAC-TGTGC-GTGTGACAGCGGCTGATCTGTCCCTG-GGCAGCGGAACC-----    |
| <i>Eptesicus fuscus</i>       | -----CCTCCAGGCGCAGGGC-AGCCACTGCC-ACCGCACACTGCGCTGTCTCC--GGACC-CAC-TGTGC-GTGTGACAGCGGCTGATCTGTCTCTG-GGCAGCGGACCCCGGCCCT |
|                               | ***      **** * * * *      *      ***** * *      *** ***** *****                                                       |

Figure S2. Confirmation of miR-210 sequence. A) Rooted phylogenetic tree based on the genomic miR-210 sequence of other closely related and distantly-related vertebrates. B) The genomic miR-210 sequence of white-crowned sparrows aligned with other species in ClustalW. The white-crowned sparrow miR-210 sequence was most similar to the pigeon, fly catcher, and penguin miR-210. Asterisks indicate conservation of the given nucleotide across species. The mature region of the zlg-miR-210 sequence (highlighted in blue) had 100% homology with the human sequence hsa-miR-210.
