# Supplementary material for: Network analysis of microRNA and mRNA seasonal dynamics in a highly plastic sensorimotor neural circuit
Source: BMC Genomics. 2015 Nov 6;16:905. doi: 10.1186/s12864-015-2175-z (PMC4636775; doi:10.1186/s12864-015-2175-z)
Supplement: Additional file 2: Figure S1. — Confirmation of miR-132 sequence. A) Rooted phylogenetic tree based on the genomic miR-132 sequences of other closely related and distantlyrelated vertebrates. B) The genomic miR-132 sequence of white-crowned sparrows aligned with other species in ClustalW. The white-crowned sparrow miR-132 sequence was most similar to zebra finch miR-132 and more distantly related to mammalian miR-132 sequences. Asterisks indicate conservation of the given nucleotide across species. The mature region of the zlg-miR-132 sequence (highlighted in blue) had 100 % homology with the human sequence hsa-miR-132. (PDF 312 kb) [file 12864_2015_2175_MOESM2_ESM.pdf]

A

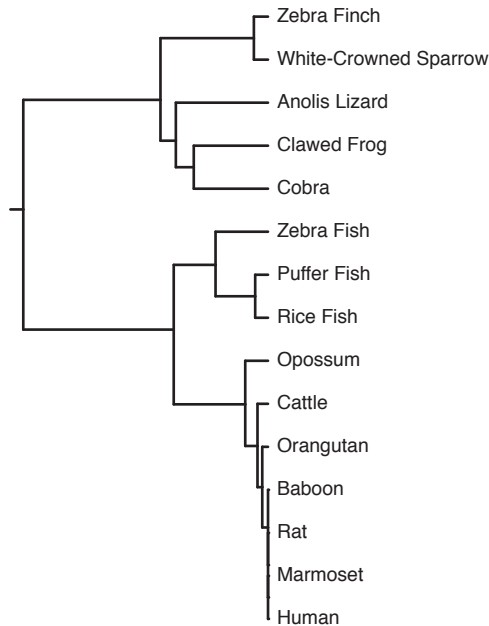

B

|                        |                                                                                                             |
|------------------------|-------------------------------------------------------------------------------------------------------------|
| Callithrix jacchus     | GCGCGTGGGCGTGCTGCGGGGCGACCATGGCTGTAGACTGTTACCTC-----CAGTTCCACAGTAACAATCGAAAGCCACG-----                      |
| Pongo pygmaeus         | GCGCGTGGGCGTGCTGCGGGGCGACCATGGCTGTAGACTGTTACCTC-----CAGTTCCACAGTAACAATCGAAAGCCACG-----                      |
| Papio anubis           | GCGCGTGGGCGTGCTGCGGGGCGACCATGGCTGTAGACTGTTACCTC-----CAGTTCCACAGTAACAATCGAAAGCCACG-----                      |
| Bos taurus             | GCGCGTGGGCGTGCTGCGGGGCGACCATGGCTGTAGACTGTTACCTC-----CGGTTCACAGTAACAATCGAAAGCCACG-----                       |
| Rattus norvegicus      | GAGCGTGGGCGTGCTGCGGGGCGACCATGGCTGTAGACTGTTACCTC-----CGGTTCACAGTAACAATCGAAAGCCACG-----                       |
| Monodelphis domestica  | CCGCGTGGGCGTGCTGCGGGGCGACCATGGCTGTAGACTGTTACCTC-----TGGTTCACAGTAACAATCGAAAGCCACG-----                       |
| Fugu rubripes          | -----TGCCCCCTAGCGACCATGGCTGTAGACTGTTACCACTGGTGCAGTTGCTACAGTAACAATCTAATGCCACG-----                           |
| Oryzias latipes        | -----TGCCCCCTAGCGACCATGGCTGTAGACTGTTACCACTGGTGCAGTTGCTACAGTAACAATCTAATGCCACG-----                           |
| Danio rerio            | -----TGCCCCCTAGCGACCATGGCTGTAGACTGTTACCACTGGTGCAGTTGCTACAGTAACAATCTAATGCCACG-----                           |
| Anolis carolinensis    | -CACGGCAACCGTCTCCAGGGCAACCGTGGCTTTAGATTGTTACTGTGC--GGACGTGGGTTTGGTAACAGTCTACAGCCATGGTTGGTCCGGCGGACGCAA----- |
| Ophiophagus hannah     | --TCATCCTGCGTCTCCAGGGCAACCGTGGCTTTAGATTGTTACTGTGT--GGATGTGGGCT--GGTAACAGTCTACAGCCATGGTTGCCCGGACT-----       |
| Zonotrichia leucophrys | -----GGCGACCGTGGCTTTAGATAGTTACTGTGC--CGCTGGGGG---AGTAACAGTCTACAGCCATGGTTCGC-----                            |
| Taeniopygia guttata    | ----ATCCGACGCCGCCGGGCGACCGTGGCTTTAGATAGTTACTGTTC--CACTGGGGG---AGTAACAGTCTACAGCCATGGTCGCCGGGACAGGCAGACTCG--- |
| Xenopus tropicalis     | -----CTGTCTCCAGGGCAACCGTGGCTTTAGATTGTTACTGTGTA---GTTCTGCATT--GGTAACAGTCTACAGCCATGGTCGCTCGGGCAAGATGC-----    |
| Homo sapiens           | -CCGCCCCCGCGTCTCCAGGGCAACCGTGGCTTTGCGATTGTTACTGTG--GGAACGTGA---GGTAACAGTCTACAGCCATGGTCGCCCGGACGACGCCACGCGC  |
|                        | ** ** * * * * * * * *                   ***** ** * * * * *                                                  |

Figure S1. Confirmation of miR-132 sequence. A) Rooted phylogenetic tree based on the genomic miR-132 sequences of other closely related and distantly-related vertebrates. B) The genomic miR-132 sequence of white-crowned sparrows aligned with other species in ClustalW. The white-crowned sparrow miR-132 sequence was most similar to zebra finch miR-132 and more distantly related to mammalian miR-132 sequences. Asterisks indicate conservation of the given nucleotide across species. The mature region of the zlg-miR-132 sequence (highlighted in blue) had 100% homology with the human sequence hsa-miR-132.
